# Supplementary material for: Agrin in the Muscularis Mucosa Serves as a Biomarker Distinguishing Hyperplastic Polyps from Sessile Serrated Lesions
Source: Oxford University Press journal article supplement (doi:10.1158/1078-0432.ccr-19-2898), 2019-12-18
Supplement: 10780432ccr192898-sup-228420_2_supp_5913340_q1v5ht.xlsx [file 10780432ccr192898-sup-228420_2_supp_5913340_q1v5ht.xlsx]

## Sheet: Supplementary Table S2
	Supplementary Table S2 – Sample information and results
	This table provides an overview of all four-hundred-eight individual patient samples used in the study including sample demographics, final diagnosis, subtype or specification and the results on AGRN muscularis mucosae (MM)-based reactivity (outliers are highlighted in magenta). Presented are also all samples selected for evaluation of AGRN staining in the MM by four non-pathologists (highlighted…
	Patient #	Gender	Age	Site of origin	Final diagnosis	Subtype / Specification / Additional comment	AGRN muscularis mucosae (MM) reactivity	Samples validated by 4 non-pathologists	Majority opinion by 9 GI experts
	1	f	69	cecum	SSL		+	✓	9
	2	m	55	right	SSL		+	✓	10
	3	m	77	transverse	SSL		+	✓	22
	4	m	45	descending	SSL		+	✓	3
	5	f	51	right	SSL		+	✓	11
	6	m	58	cecum	SSL		+
	7	f	61	left	SSL		+	✓	4
	8	f	63	right	SSL		+	✓
	9	f	59	sigmoid	SSL		+	✓
	10	f	64	ascending	SSL		+	✓	15
	11	f	69	right	SSL		+
	12	f	65	cecum	SSL		+
	13	m	55	right	SSL		+
	14	m	62	left	SSL		+
	15	f	68	right	SSL		+
	16	f	71	right	SSL		+
	17	f	71	right	SSL		+	✓
	18	f	51	transverse	SSL		+	✓
	19	f	72	transverse	SSL		+
	20	m	54	transverse	SSL		+	✓	23
	21	m	57	right	SSL		+	✓
	22	m	67	right	SSL		+
	23	m	62	ascending	SSL		+
	24	m	62	transverse	SSL		+	✓
	25	f	53	sigmoid	SSL		-	✓	25
	26	m	70	sigmoid	SSL		+
	27	m	73	cecum	SSL		+
	28	f	54	hepatic flexure	SSL		+	✓	17
	29	f	53	rectum	SSL		+	✓	5
	30	m	62	right	SSL		+	✓	12
	31	m	56	cecum	SSL		+
	32	f	70	sigmoid	SSL		+	✓
	33	f	60	ascending	SSL		+
	34	m	70	ascending	SSL		+	✓	18
	35	f	70	left	SSL		+	✓	6
	36	m	28	left	SSL		+	✓	7
	37	m	56	left	SSL		+	✓
	38	m	51	sigmoid	SSL		+
	39	m	50	transverse	SSL		+	✓	24
	40	m	48	hepatic flexure	SSL		+
	41	m	48	right	SSL		+
	42	m	63	sigmoid	SSL		- / but excluded, see Fig. S7C, no MM left	✓	49
	43	f	40	cecum	SSL		+	✓
	44	f	71	transverse	SSL		+	✓
	45	m	51	transverse	SSL		+
	46	f	50	descending	SSL		+	✓
	47	f	50	descending	SSL		+	✓	2
	48	m	57	transverse	SSL		+	✓	21
	49	m	68	descending	SSL		+	✓	8
	50	f	54	right	SSL		+	✓	20
	51	m	70	transverse	SSL		+
	52	f	66	transverse	SSL		+
	53	f	51	right	SSL		+
	54	m	60	cecum	SSL		+
	55	m	56	cecum	SSL		+
	56	f	65	rectum	SSL		+
	57	m	54	sigmoid	SSL		+
	58	m	54	descending	SSL		+
	59	f	56	hepatic flexure	SSL		+
	60	m	51	right	SSL		+
	61	m	52	transverse	SSL		+
	62	m	54	sigmoid	SSL		+
	63	m	85	right	SSL		+
	64	f	70	rectosigmoid	SSL		+
	65	m	51	rectum	SSL		+
	66	m	58	right	SSL		+
	67	f	50	sigmoid	SSL		+
	68	m	67	right	SSL		+
	69	f	69	rectum	SSL		+
	70	f	69	ascending	SSL		+
	71	f	66	right	SSL		+
	72	f	70	ascending	SSL		+
	73	f	60	transverse	SSL		+
	74	m	52	descending	SSL		+
	75	f	66	right	SSL		+
	76	m	58	hepatic flexure	SSL		+
	77	m	65	ascending	SSL		+
	78	m	67	left	SSL		+
	79	f	71	rectum	SSL		+
	80	f	67	sigmoid	SSL		-
	81	f	51	cecum	SSL		+
	82	f	75	right	SSL		+
	83	m	57	transverse	SSL		+
	84	m	56	ascending	SSL		+
	85	m	59	right	SSL		+
	86	m	39	transverse	SSL		+
	87	m	55	rectum	SSL		+
	88	m	55	right	SSL		+
	89	m	55	sigmoid	SSL		+
	90	f	35	left	SSL		+
	91	m	71	right	SSL		+
	92	f	60	cecum	SSL		+
	93	f	60	rectum	SSL		+
	94	f	79	ascending	SSL		+
	95	f	62	right	SSL		+
	96	f	74	descending	SSL		+
	97	f	65	ascending	SSL		+
	98	f	74	left	SSL		+
	99	m	75	hepatic flexure	SSL		+
	100	m	54	ascending	SSL		+
	101	m	55	ascending	SSL		+
	102	f	59	ascending	SSL		+
	103	m	56	transverse	SSL		+
	104	f	49	ascending	SSL		+
	105	f	49	rectum	SSL		+
	106	m	69	descending	SSL		+
	107	m	68	transverse	SSL		+
	108	f	56	ascending	SSL		+
	109	m	72	left	SSL		+
	110	f	60	ascending	SSL		+
	111	m	60	right	SSL		+
	112	f	70	descending	SSL		+
	113	f	55	right	SSL		+
	114	m	63	transverse	SSL		+
	115	m	50	cecum	SSL		+
	116	f	57	right	SSL		+
	117	f	55	ascending	SSL		+
	118	f	59	left	SSL		+
	119	m	79	right	SSL		+
	120	f	63	right	SSL		+
	121	m	71	hepatic flexure	SSL		+
	122	f	71	transverse	SSL		+
	123	f	71	sigmoid	SSL		+
	124	f	51	descending	SSL		-
	125	f	63	left	SSL		+
	126	f	63	right	SSL		+
	127	f	49	cecum	SSL		+
	128	f	49	ascending	SSL		+
	129	m	70	right	SSL		+
	130	f	73	sigmoid	SSL		+
	131	m	58	descending	SSL		+
	132	f	62	sigmoid	SSL		+
	133	m	46	cecum	SSL		+
	134	m	76	hepatic flexure	SSL		+
	135	m	57	descending	SSL		+
	136	m	57	ascending	SSL		+
	137	m	57	transverse	SSL		+
	138	m	57	sigmoid	SSL		+
	139	m	62	descending	SSL		+
	140	f	53	sigmoid	SSL		+
	141	m	61	cecum	SSL		+
	142	f	53	transverse	SSL		+
	143	f	53	left	SSL		+
	144	m	66	descending	SSL		+
	145	m	66	rectosigmoid	SSL		+
	146	f	36	right	SSL		+
	147	f	48	ascending	SSL		+
	148	m	32	transverse	SSL		+
	149	f	87	transverse	SSL	SPS	+
	150	f	86	transverse	SSL	SPS	+
	151	f	68	cecum	SSL	SPS	+
	152	f	67	hepatic flexure	SSL	SPS	+
	153	f	66	ascending	SSL	SPS	+
	154	m	56	cecum	SSL	SPS	+
	155	m	73	ascending	SSL	SPS	+
	156	m	73	transverse	SSL	SPS	+
	157	m	82	hepatic flexure	SSL	SPS	+
	158	m	74	ascending	SSL	SPS	+
	159	f	80	transverse	SSL	SPS	+
	160	f	78	cecum	SSL	SPS	+
	161	m	67	transverse	SSL	SPS	+
	162	m	70	transverse	SSL	SPS	+
	163	f	69	transverse	SSL	SPS	+
	164	f	70	sigmoid	SSL	SPS	+
	165	m	70	transverse	SSL	SPS	+
	166	m	71	transverse	SSL	SPS	+
	167	f	71	ascending	SSL with dysplasia		+	✓
	168	f	59	right	SSL with dysplasia		+
	169	f	70	ascending	SSL with dysplasia		+
	170	m	48	right	SSL with dysplasia		+
	171	m	63	descending	SSL with dysplasia		+	✓	1
	172	m	89	cecum	SSL with dysplasia		+	✓	16
	173	m	52	cecum	SSL with dysplasia		+	✓	13
	174	f	70	right	SSL with dysplasia		+
	175	m	70	cecum	SSL with dysplasia		+	✓
	176	m	70	ascending	SSL with dysplasia		+
	177	m	70	ascending	SSL with dysplasia		+	✓	19
	178	f	70	cecum	SSL with dysplasia		+	✓	14
	179	m	64	transverse	SSL with dysplasia		+
	180	f	77	sigmoid	SSL with dysplasia		+
	181	m	70	transverse	SSL with dysplasia		+
	182	f	83	transverse	SSL with dysplasia		+
	183	m	84	ascending	SSL with dysplasia		+
	184	m	69	left	SSL with dysplasia		+
	185	m	73	right	SSL with dysplasia		+
	186	m	69	cecum	SSL with dysplasia		+
	187	m	64	descending	SSL with dysplasia		+
	188	m	61	right	SSL with dysplasia		+
	189	f	67	right	SSL with dysplasia		+
	190	m	50	rectosigmoid	HP	GCHP	-	✓	31
	191	f	74	rectum	HP	GCHP	-	✓
	192	f	73	rectum	HP	GCHP	-	✓
	193	m	50	rectum	HP	GCHP	-	✓	28
	194	m	54	rectosigmoid	HP	GCHP	-	✓
	195	f	79	rectum	HP	GCHP	-	✓	32
	196	m	66	rectum	HP	MVHP	-	✓
	197	f	72	rectum	HP	MVHP	-	✓	33
	198	f	72	cecum	HP	GCHP	excluded, see Fig. S7C, slide is to damaged	✓	47
	199	m	54	descending	HP	GCHP	-
	200	m	65	transverse	HP	MVHP	-
	201	m	47	rectum	HP	MVHP	-	✓
	202	m	58	left	HP	GCHP	-	✓
	203	f	51	rectum	HP	MVHP	-	✓	29
	204	f	49	sigmoid	HP	GCHP	-
	205	m	53	rectum	HP	MVHP	-	✓	30
	206	f	59	rectum	HP	MVHP	-	✓	34
	207	m	29	sigmoid	HP	GCHP	+ / but excluded, see Fig. S7C, H&E and IHC are different levels	✓	48
	208	f	68	rectum	HP	MVHP	-	✓	35
	209	m	65	rectum	HP	GCHP	-	✓	36
	210	f	63	sigmoid	HP	GCHP	-
	211	m	52	right	HP	GCHP	-	✓
	212	f	74	rectum	HP	MVHP	-	✓	41
	213	m	62	sigmoid	HP	MVHP	-
	214	f	55	rectum	HP	MVHP	-
	215	f	52	rectum	HP	MVHP	-	✓
	216	f	48	right	HP	MVHP	+	✓	27
	217	m	56	rectum	HP	MVHP	-	✓	37
	218	m	72	rectum	HP	GCHP	-
	219	m	72	rectum	HP	MVHP	-
	220	m	68	rectum	HP	MVHP	-	✓
	221	m	62	rectosigmoid	HP	MVHP	-
	222	m	62	left	HP	MVHP	-	✓	38
	223	f	66	left	HP	GCHP	-	✓	42
	224	f	64	sigmoid	HP	MVHP	-	✓	39
	225	f	84	descending	HP	MVHP	+ / no majority: 4=HP, 3=SSL, 2=TSA, excluded from calculations	✓	26
	226	f	67	rectum	HP	MVHP	-	✓	40
	227	f	70	transverse	HP	MVHP	-
	228	m	50	rectum	HP	GCHP	-
	229	m	50	sigmoid	HP	MVHP	-
	230	m	50	rectum	HP	GCHP	-
	231	m	66	splenic flexture	HP	GCHP	-
	232	f	70	rectosigmoid	HP	MVHP	-
	233	m	51	rectum	HP	MVHP	-
	234	f	50	rectum	HP	GCHP	-
	235	m	46	right	HP	MVHP	-
	236	m	63	sigmoid	HP	MVHP	-
	237	m	58	sigmoid	HP	MVHP	-
	238	f	55	sigmoid	HP	GCHP	+
	239	f	58	rectum	HP	GCHP	-
	240	m	54	transverse	HP	GCHP	+
	241	f	57	sigmoid	HP	GCHP	-
	242	m	68	rectum	HP	GCHP	-
	243	m	69	sigmoid	HP	MVHP	-
	244	m	50	sigmoid	HP	MVHP	-
	245	f	54	sigmoid	HP	MVHP	-
	246	m	60	rectum	HP	MVHP	-
	247	m	41	sigmoid	HP	GCHP	-
	248	f	50	rectosigmoid	HP	GCHP	-
	249	f	51	sigmoid	HP	GCHP	-
	250	m	43	rectum	HP	MVHP	+
	251	f	49	descending	HP	GCHP	-
	252	f	49	sigmoid	HP	GCHP	-
	253	m	64	cecum	HP	MVHP	-
	254	m	64	rectosigmoid	HP	GCHP	-
	255	f	67	sigmoid	HP	GCHP	-
	256	f	67	rectum	HP	MVHP	-
	257	f	53	sigmoid	HP	MVHP	-
	258	m	45	rectum	HP	MVHP	+
	259	m	58	sigmoid	HP	MVHP	-
	260	m	42	transverse	HP	GCHP	-
	261	m	63	rectum	TSA		-
	262	m	61	splenic flexture	TSA		-	✓	43
	263	m	63	rectum	TSA		-	✓	44
	264	f	58	cecum	TSA		-	✓	46
	265	m	61	sigmoid	TSA		-	✓	45
	266	f	74	descending	TSA		-
	267	m	59	sigmoid	TSA		-
	268	f	76	rectum	TSA		-
	269	f	80	rectum	TSA		-
	270	m	77	right	TSA		-
	271	m	76	transverse	TSA		-
	272	f	54	sigmoid	TSA		-
	273	f	64	rectum	TSA		-
	274	f	59	cecum	TSA		-
	275	f	87	rectum	TSA		-
	276	m	75	rectosigmoid	TSA		-
	277	m	67	rectum	TSA		-
	278	f	83	rectum	TSA		-
	279	m	56	rectum	TSA		-
	280	m	53	rectum	TSA		-
	281	f	74	sigmoid	TSA		-
	282	f	83	rectum	TSA		-
	283	f	78	transverse	TSA		-
	284	f	72	rectum	TSA		-
	285	m	50	rectosigmoid	TSA		-
	286	m	55	rectosigmoid	TA		-	✓
	287	m	76	sigmoid	TA		-
	288	m	76	rectum	TA		-
	289	m	61	cecum	TA		-
	290	m	50	splenic flexture	TA		-
	291	f	50	left	TA		-	✓
	292	m	60	hepatic flexure	TA		-
	293	f	68	cecum	TA		-
	294	m	45	hepatic flexure	TA		-	✓
	295	m	25	rectum	TA		-	✓
	296	m	53	splenic flexture	TA		-
	297	f	63	sigmoid	TA		-	✓
	298	m	50	right	TA		-
	299	f	54	descending	TA		-
	300	m	71	transverse	TA		-
	301	f	47	transverse	TA		-	✓
	302	m	45	cecum	TA		-
	303	m	65	right	TA		-	✓
	304	m	71	cecum	TA		-
	305	m	71	sigmoid	TA		-
	306	m	50	transverse	TA		-
	307	f	48	transverse	TA		-
	308	m	42	sigmoid	TA		-
	309	m	50	rectum	TA		-
	310	f	58	sigmoid	TA		-	✓
	311	m	47	hepatic flexure	TA		-
	312	m	63	transverse	TA		-
	313	m	70	sigmoid	TA		-
	314	m	61	ascending	TA		-
	315	m	63	descending	TA		-
	316	f	55	hepatic flexure	TA		-	✓
	317	m	62	right	TA		-
	318	m	70	sigmoid	TA		-
	319	m	59	transverse	TA		-	✓
	320	f	54	sigmoid	TA		-
	321	f	64	splenic flexture	TA		-
	322	f	69	right	TA		-
	323	f	69	right	TA		-
	324	f	65	cecum	TA		-
	325	m	55	right	TA		-
	326	f	68	left	TA		- / excluded, see Fig. S7C, majority opinion is "other"	✓	50
	327	m	62	sigmoid	TA		-
	328	m	62	ascending	TA		-
	329	m	63	descending	TA		-
	330	m	70	sigmoid	TA		-
	331	m	52	cecum	TA		-
	332	m	72	rectum	TA		-
	333	m	72	rectum	TA		-
	334	f	70	cecum	TA		-
	335	f	62	sigmoid	TA		-
	336	m	78	sigmoid	TA		-
	337	m	59	sigmoid	TA		-
	338	f	77	right	TA		-
	339	m	59	rectum	TA		-
	340	m	59	transverse	TA		-
	341	f	73	transverse	TA		-
	342	f	83	transverse	TA		-
	343	m	62	ascending	TA		-
	344	f	56	sigmoid	TA		-
	345	m	72	sigmoid	TA		-
	346	m	75	hepatic flexure	TA		-
	347	f	67	hepatic flexure	TA		-
	348	m	82	hepatic flexure	TA		-
	349	m	67	transverse	TA		-
	350	m	51	cecum	TA in IBD		-
	351	f	51	sigmoid	TA in IBD		-	✓
	352	m	65	transverse	TA in IBD		-
	353	f	53	descending	TA in IBD		-	✓
	354	m	71	transverse	TA in IBD		-	✓
	355	m	60	transverse	TA in IBD		-
	356	f	58	rectum	TA in IBD		-
	357	m	76	cecum	TA in IBD		-
	358	f	72	transverse	TA in IBD		-	✓
	359	m	14	right	hamartomatous polyp	PJP	-	✓
	360	m	15	sigmoid	hamartomatous polyp	PJP	-
	361	m	38	terminal ileum	hamartomatous polyp	PJP	-
	362	m	38	terminal ileum	hamartomatous polyp	PJP	-
	363	m	6	right	hamartomatous polyp	PJP	-	✓
	364	m	6	right	hamartomatous polyp	PJP	-	✓
	365	m	74	right	hamartomatous polyp	PJP	-	✓
	366	m	23	right	hamartomatous polyp	PJP	-	✓
	367	m	33	transverse	hamartomatous polyp	JPS	-
	368	f	4	rectum	hamartomatous polyp	JPS	-
	369	m	54	rectum	hamartomatous polyp	JPS	-	✓
	370	f	15	sigmoid	hamartomatous polyp	JPS	-	✓
	371	f	13	ascending	hamartomatous polyp	JPS	-
	372	m	4	transverse	hamartomatous polyp	JPS	-	✓
	373	m	2	rectum	hamartomatous polyp	JPS	-	✓
	374	m	4	rectosigmoid	hamartomatous polyp	JPS	-
	375	f	10	left	hamartomatous polyp	JPS	-
	376	m	48	sigmoid	hamartomatous polyp	JPS	-	✓
	377	f	29	rectum	prolapse polyp		-
	378	m	36	rectum	prolapse polyp		-
	379	m	47	descending	prolapse polyp		-
	380	f	63	right	IBD dysplasia		-
	381	m	64	right	IBD dysplasia		-
	382	f	85	cecum	IBD dysplasia		-	✓
	383	m	65	transverse	IBD dysplasia		-
	384	f	74	rectum	IBD dysplasia		-
	385	f	75	right	IBD dysplasia		-
	386	m	71	transverse	IBD dysplasia		-
	387	m	50	rectum	IBD dysplasia		-
	388	m	69	cecum	IBD dysplasia		-	✓
	389	m	52	rectum	IBD dysplasia		-
	390	f	52	rectum	IBD dysplasia		-	✓
	391	m	63	cecum	IBD dysplasia		-
	392	m	50	left	IBD dysplasia		-
	393	f	71	rectum	IBD dysplasia		-
	394	f	71	rectum	IBD dysplasia		-
	395	f	71	rectum	IBD dysplasia		-
	396	m	52	right	IBD dysplasia		-
	397	m	52	right	IBD dysplasia		-
	398	m	52	right	IBD dysplasia		-
	399	m	43	left	IBD dysplasia		-
	400	m	43	left	IBD dysplasia		-
	401	m	46	rectum	IBD dysplasia		-
	402	m	46	rectum	IBD dysplasia		-
	403	f	49	left	IBD dysplasia		-	✓
	404	m	61	ascending	IBD dysplasia		-
	405	m	48	cecum	IBD dysplasia		-
	406	f	60	ascending	IBD dysplasia		-
	407	f	61	rectum	IBD dysplasia		-
	408	f	61	rectum	IBD dysplasia		-
